# Supplementary material for: Nanomolar Zn(ii) sensing and subsequent PPi detection in physiological medium and live cells with a benzothiazole functionalized chemosensor
Source: Royal Society of Chemistry journal article supplement (doi:10.1039/c5ra09150k), 2015-01-01
Supplement: c5ra09150k1.pdf [file c5ra09150k1.pdf]

**Electronic Supporting Information (ESI) for**

**Nanomolar Zn(II) Sensing and Subsequent PPI  
Detection in Physiological Medium and Live Cells with  
A Benzothiazole Functionalized Chemosensor**

Abhijit Gogoi<sup>a</sup>, Sandipan Mukherjee<sup>b</sup>, Aiyagari Ramesh\*<sup>b</sup> and Gopal Das\*<sup>a</sup>

<sup>a</sup>Department of Chemistry, Indian Institute of Technology Guwahati, Guwahati 781039, India. Fax: + 91 361 2582349; Tel: +91 3612582313; E-mail: gdas@iitg.ernet.in.

<sup>b</sup>Department of Biosciences and Bioengineering, Indian Institute of Technology, Guwahati, Guwahati, 781039, India. Fax: + 91 361 2582249; Tel: +91 3612582205; E-mail: aramesh@iitg.ernet.in.

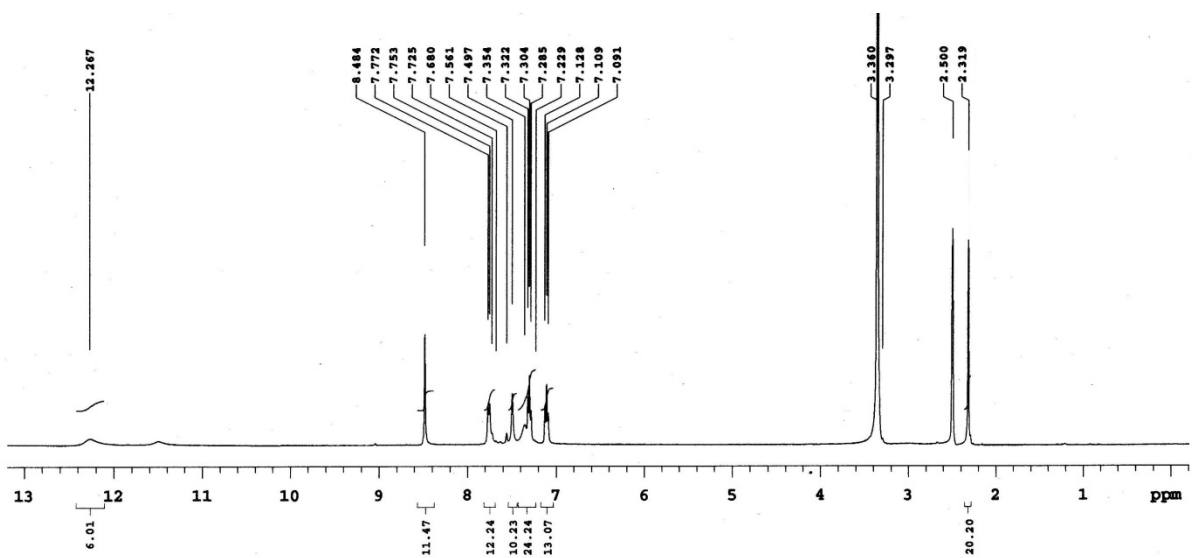

Figure S1.  $^1\text{H}$  NMR of  $\text{L}_1$  in  $\text{DMSO-d}_6$  solution at room temperature.

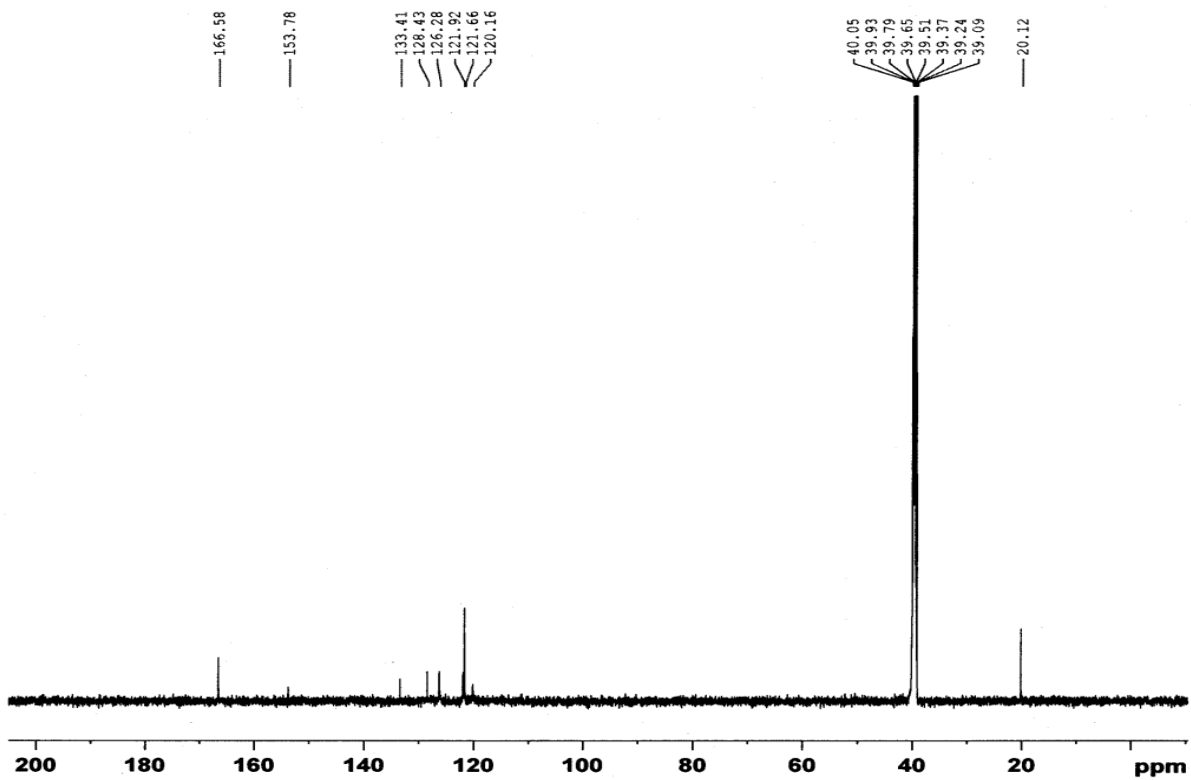

Figure S2.  $^{13}\text{C}$  NMR of  $\text{L}_1$  in  $\text{DMSO-d}_6$  solution at room temperature.

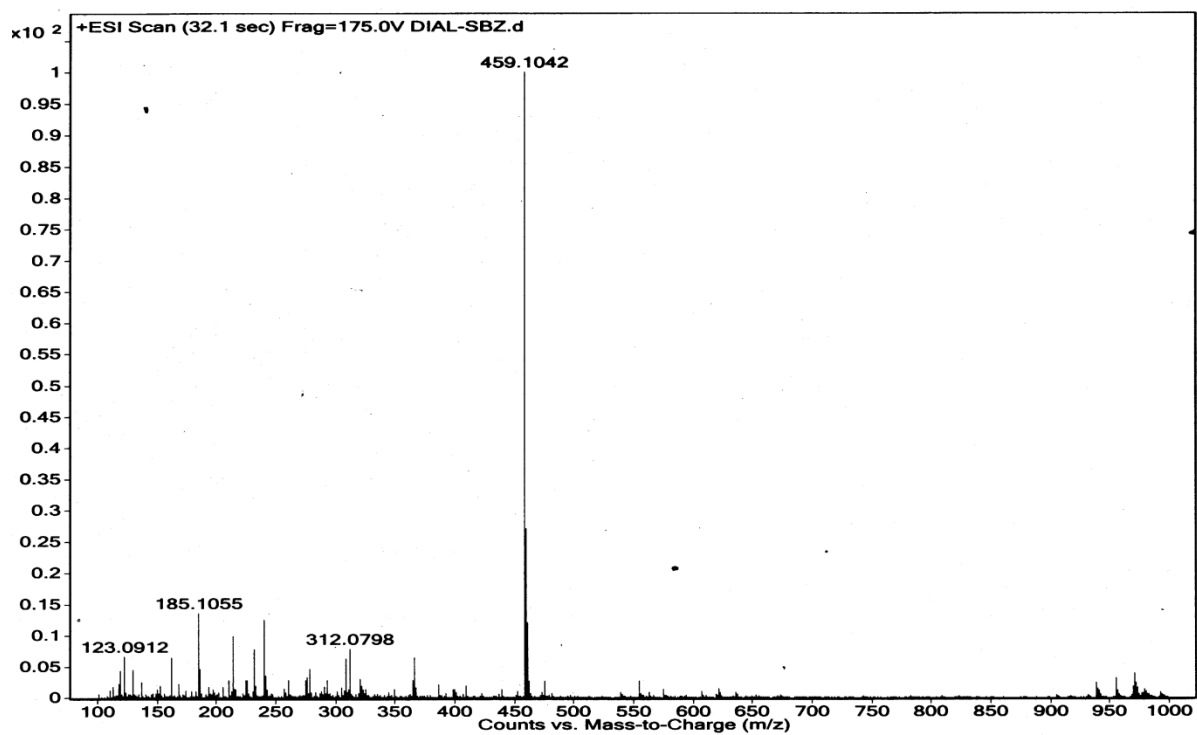

Figure S3. ESI-MS Mass Spectrum of L<sub>1</sub> in positive mode.

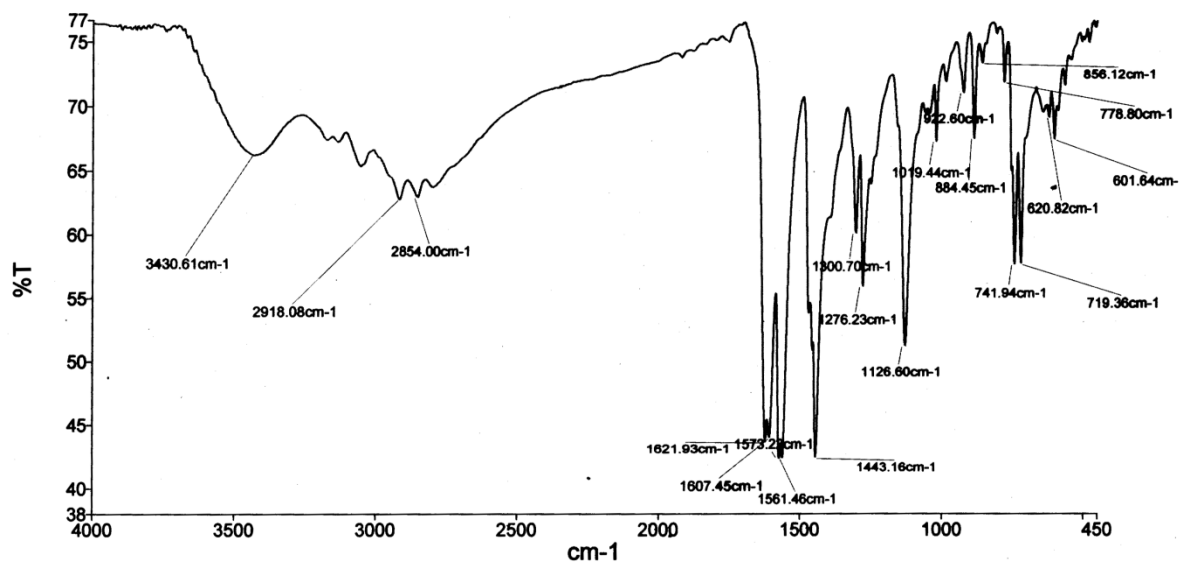

Figure S4. IR spectrum of L<sub>1</sub> recorded on KBr disc.

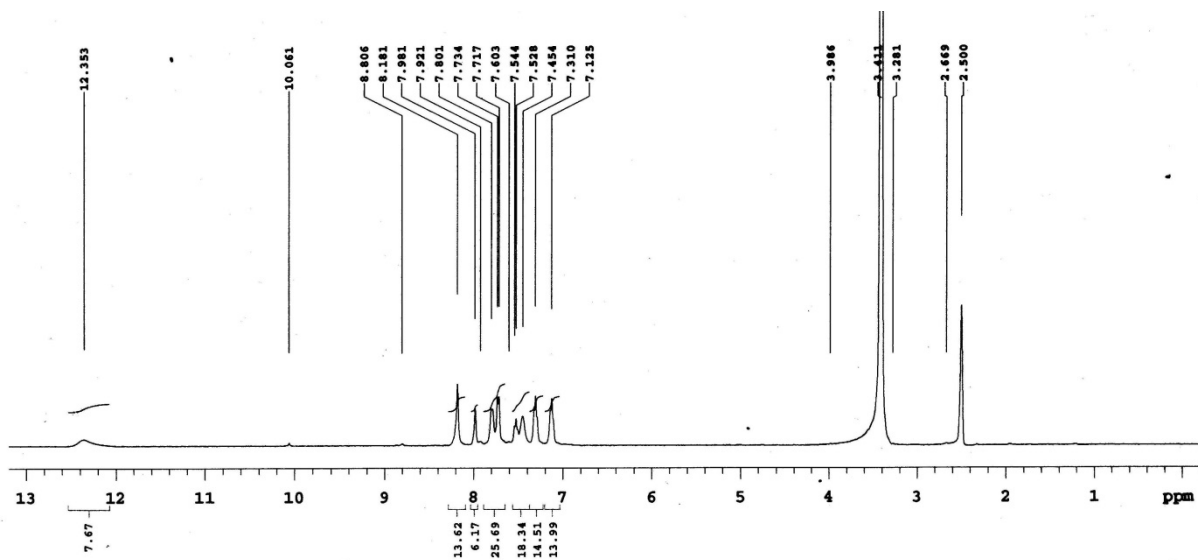

Figure S5.  $^1\text{H}$  NMR of  $\text{L}_2$  in  $\text{DMSO-d}_6$  solution at room temperature.

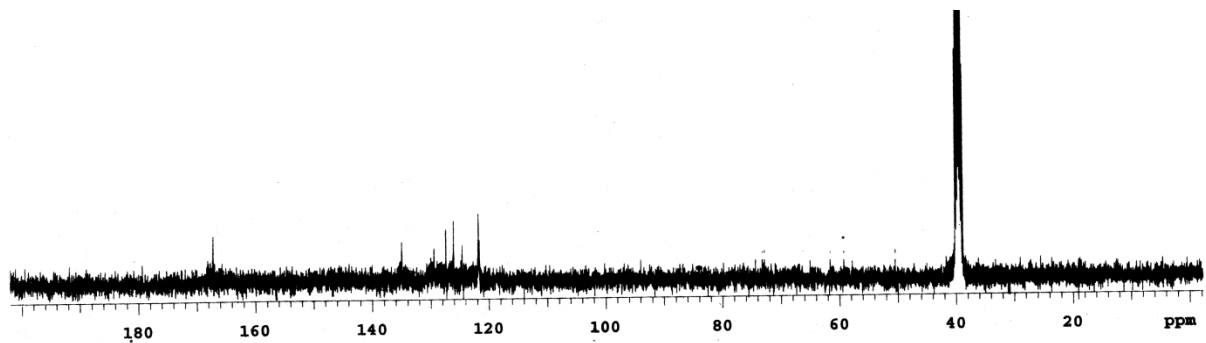

Figure S6.  $^{13}\text{C}$  NMR of  $\text{L}_2$  in  $\text{DMSO-d}_6$  solution at room temperature

|               |              |             |             |                 |                                   |                        |             |
|---------------|--------------|-------------|-------------|-----------------|-----------------------------------|------------------------|-------------|
| Sample Name   | Unavailable  | Position    | Unavailable | Instrument Name | Unavailable                       | User Name              | Unavailable |
| Inj Vol       | Unavailable  | InjPosition | Unavailable | SampleType      | Unavailable                       | IRM Calibration Status | Success     |
| Data Filename | AG-CONTROL.d | ACQ Method  |             | Comment         | Sample information is unavailable | Acquired Time          | Unavailable |

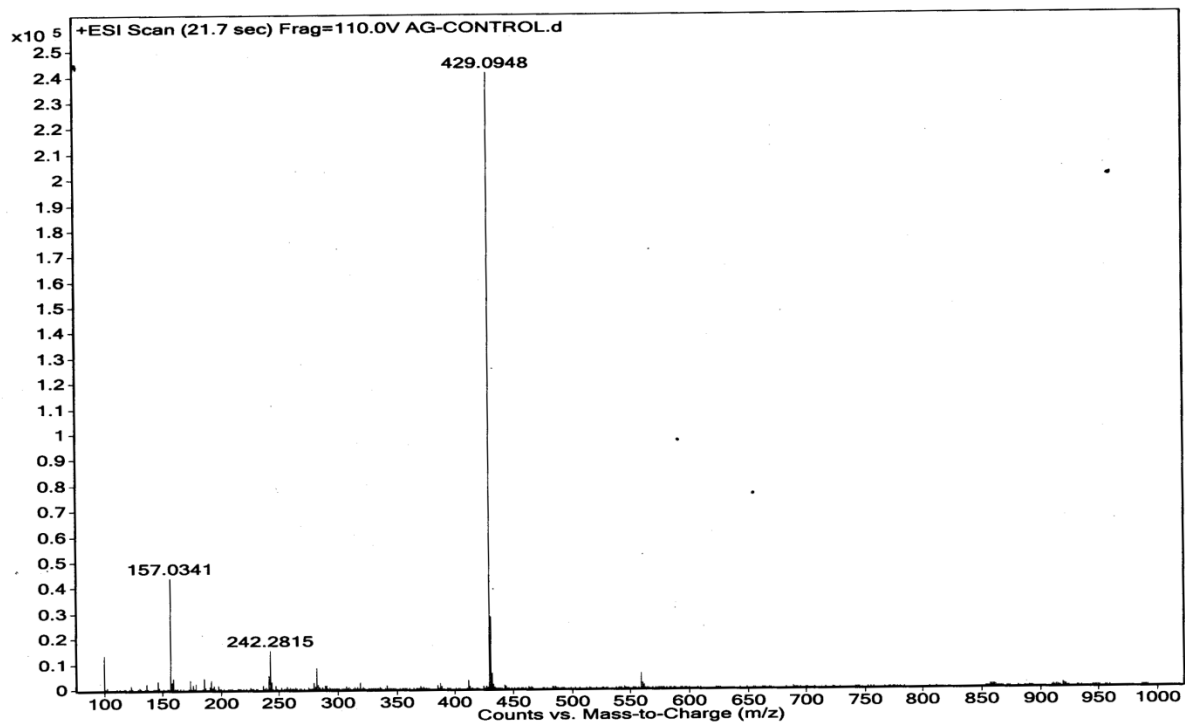

Figure S7. ESI-MS Mass Spectrum of L<sub>2</sub> in positive mode.

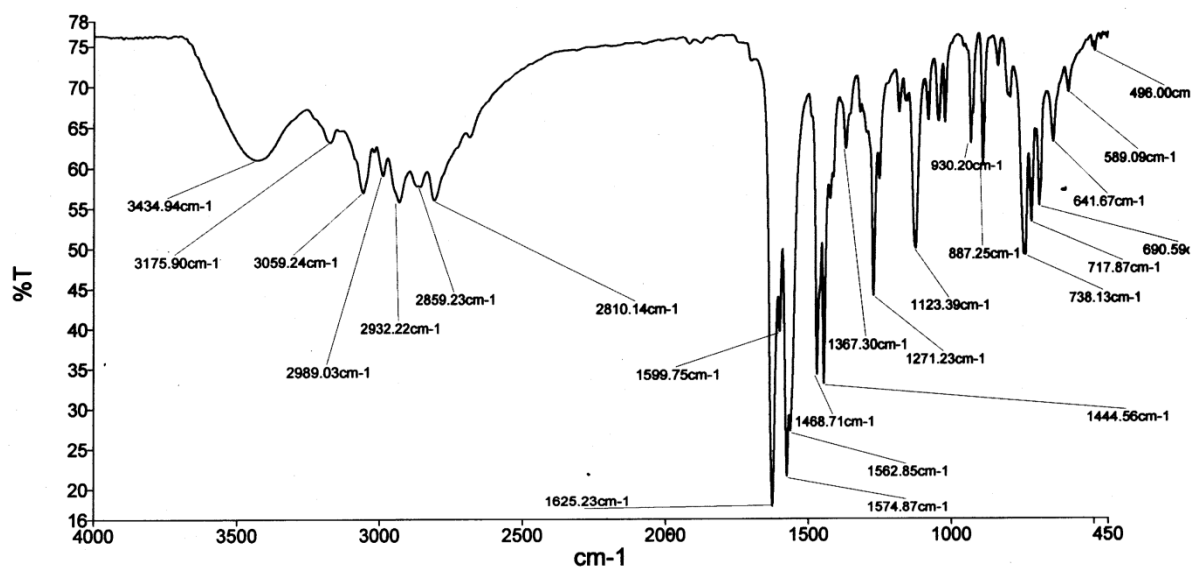

Figure S8. IR spectrum of L<sub>2</sub> recorded on KBr disc.

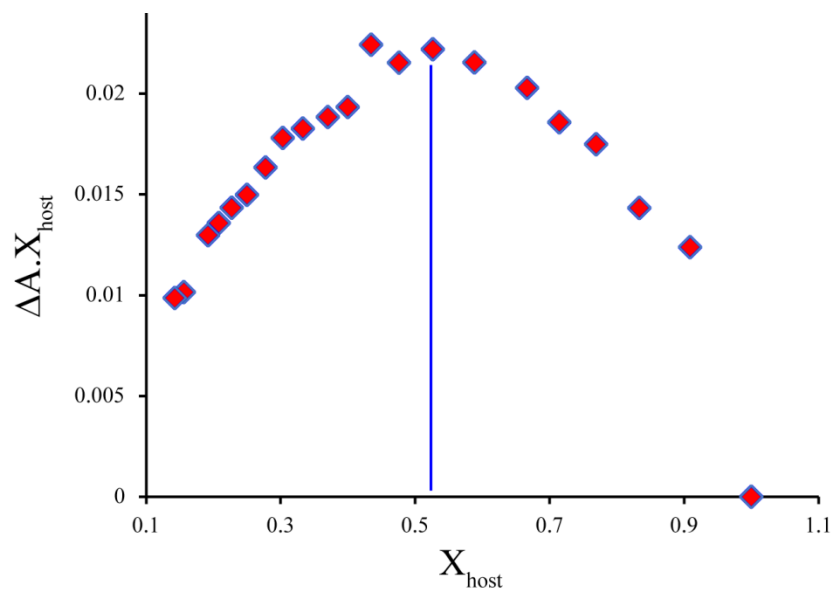

Figure S9. The Job's plot for determining the binding stoichiometry of  $\mathbf{L}_1$  with  $\text{Zn}^{2+}$  (1:1 host-guest complex).

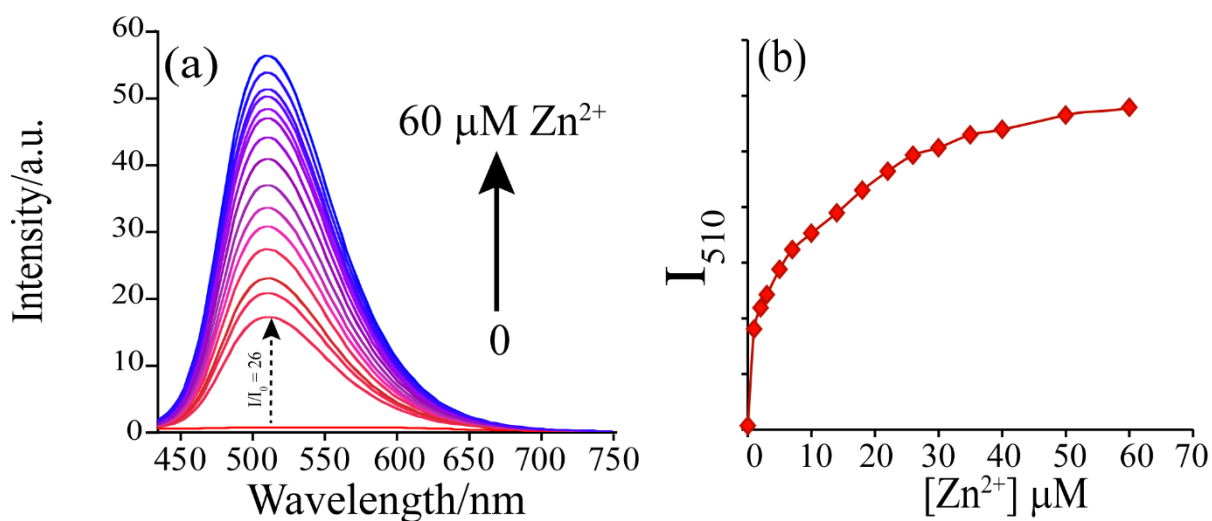

Figure S10. Fluorescence titration of  $\mathbf{L}_1$  with varying  $\text{Zn}^{2+}$  concentration from 0 to 60  $\mu\text{M}$  ( $\lambda_{\text{ex}} = 430 \text{ nm}$ , slit = 3/3 nm) in buffered ethanol (1:1:: EtOH: 10 mM HEPES buffer, pH~7.2). (b) Fluorescence Intensity at 510 nm versus  $\text{Zn}^{2+}$  concentration ( $\mu\text{M}$ ) plot.

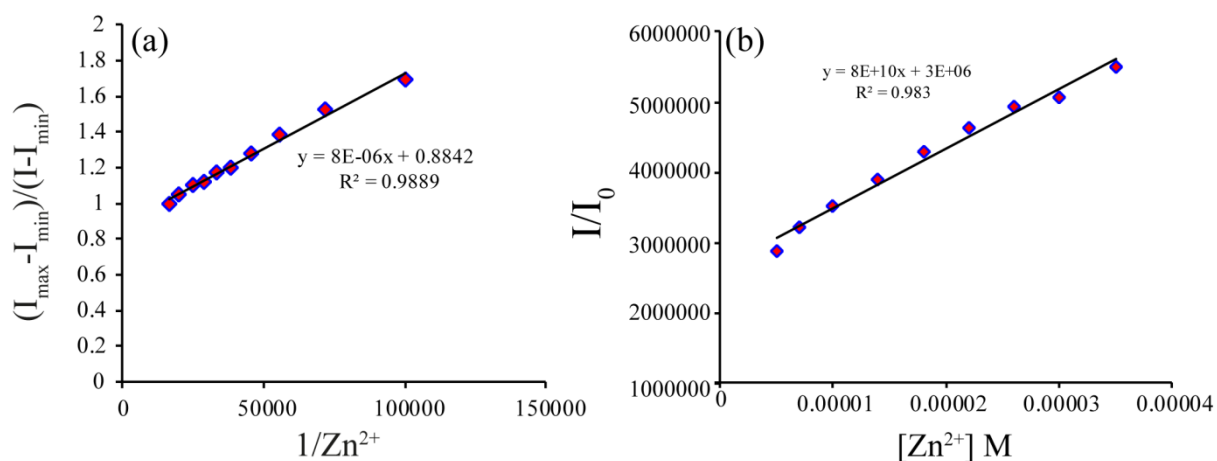

Figure S11. (a) The Bensei-Hildebrand plot to calculate the binding constant for  $Zn^{2+}$  ion in buffered ethanol solution. (b) Ratio of fluorescence emission intensity change at 510 nm versus  $Zn^{2+}$  concentrations for the LOD calculation.

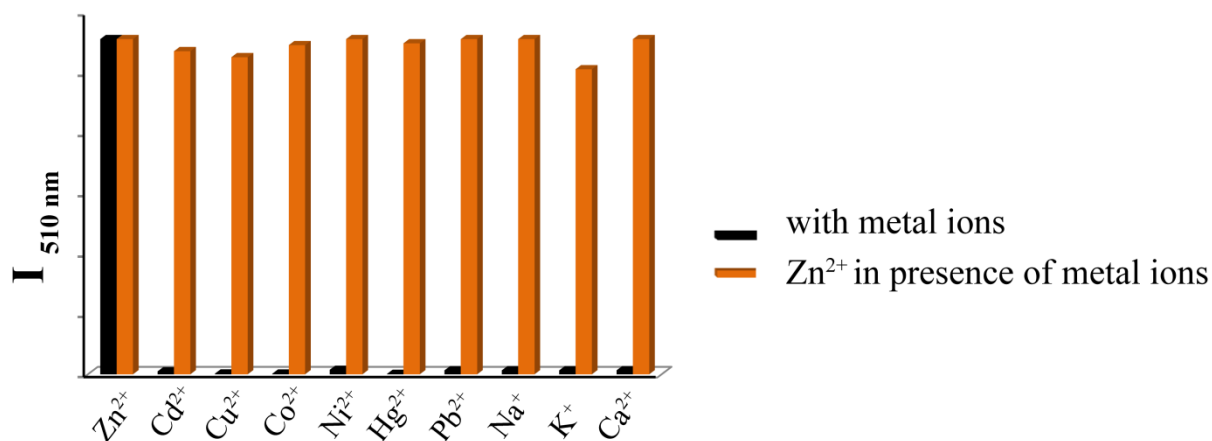

Figure S12. Bar plot presentation of  $L_1$  and  $Zn^{2+}$  in the presence of various other metal ions.

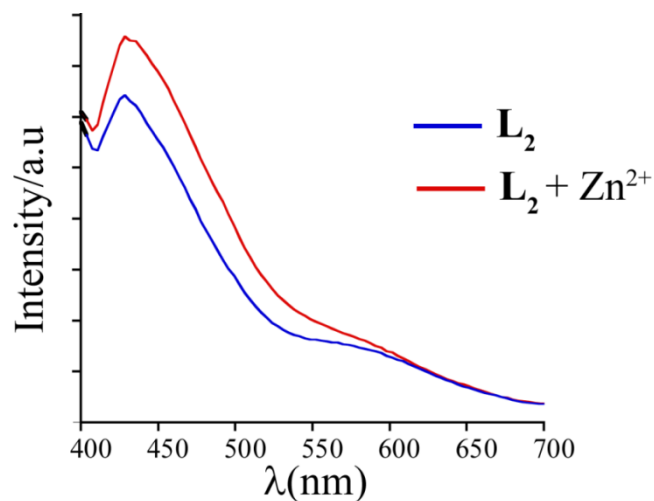

Figure S13. Fluorescence emission change after addition of  $Zn^{2+}$  to  $L_2$  under the same experimental condition.

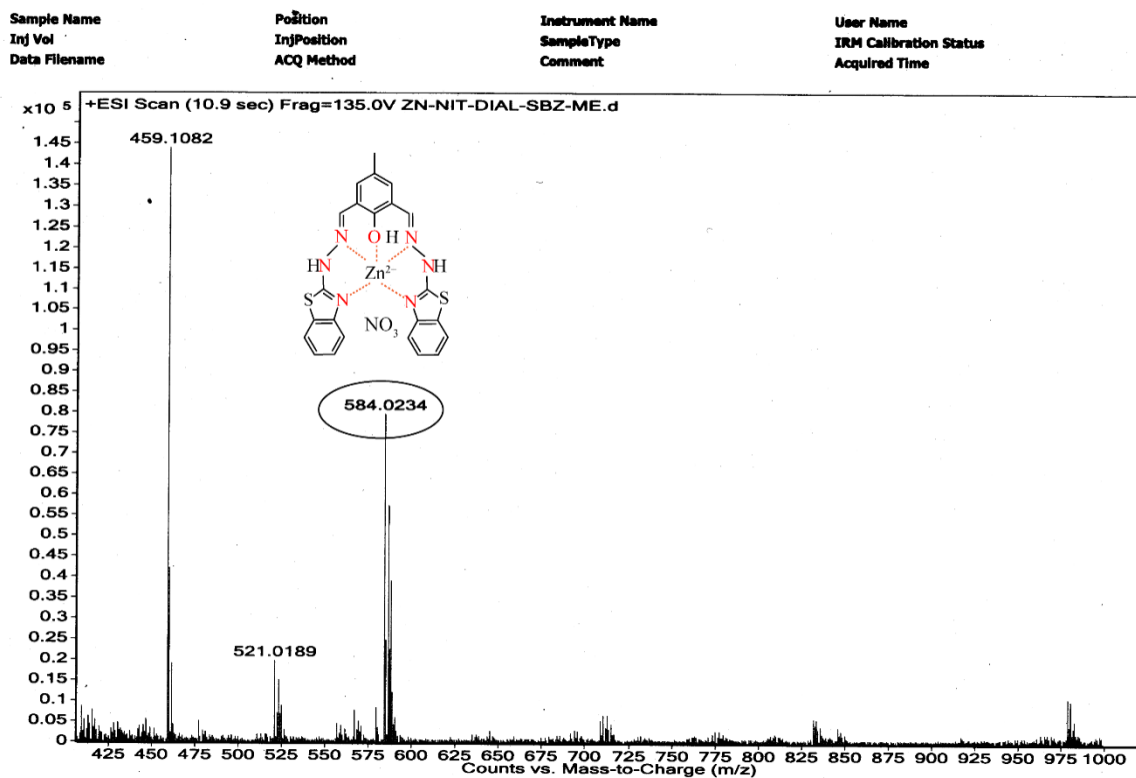

Figure S14. HRMS analysis of the solution of  $L_1$  with  $Zn(NO_3)_2$ .



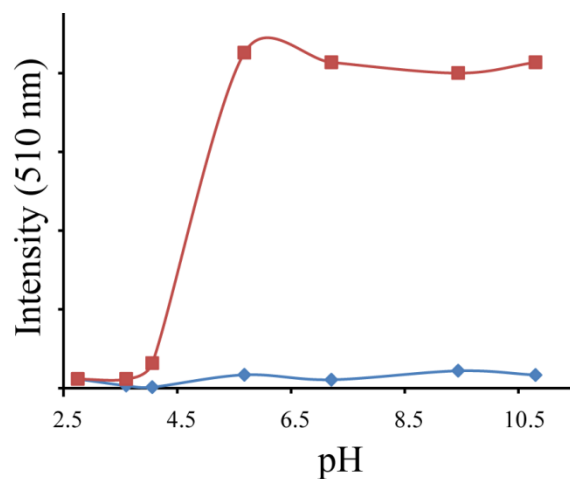

Figure S15. Effect of pH on emission behaviour of  $L_1$  and ' $L_1$ -Zn<sup>2+</sup> ensemble' (Blue line represents the change for  $L_1$ , whereas the changes for ' $L_1$ -Zn<sup>2+</sup> ensemble' is represented by red line).

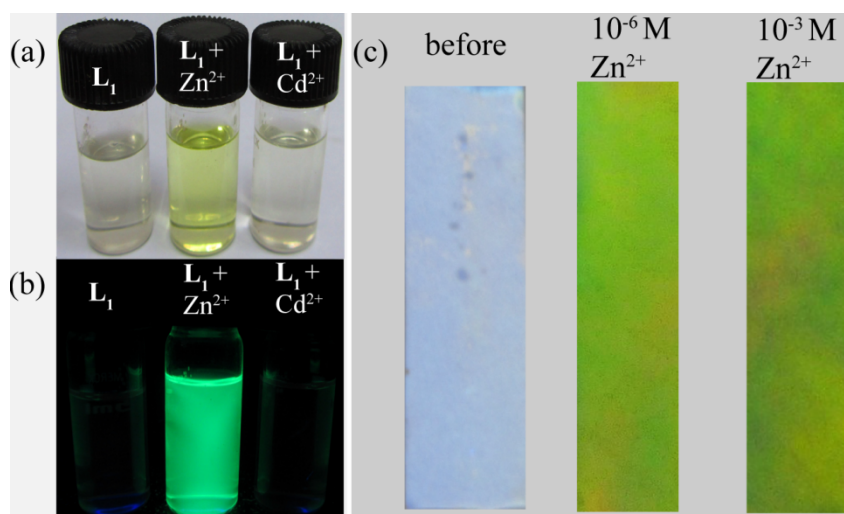

Figure S16. Change in colour after addition of Zn<sup>2+</sup> and Cd<sup>2+</sup> ions to  $L_1$  under normal light and (b) under the UV lamp. (c) The paper coated colour change experiment with different concentration of Zn<sup>2+</sup> ion under the UV lamp ( $\lambda = 365$  nm).

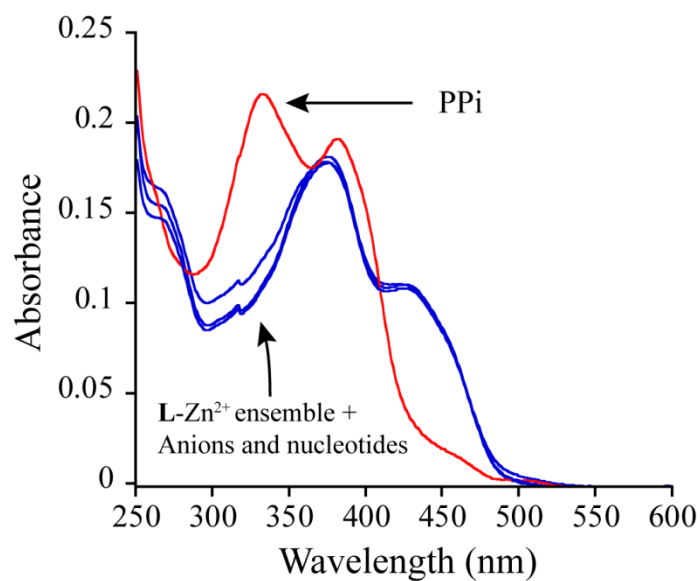

Figure S17. Change in UV-VIS absorption spectra of ' $L_1$ - $Zn^{2+}$ ' ensemble with different anions in the buffered ethanol (1:1:: EtOH: 10 mM HEPES buffer, pH~7.2).

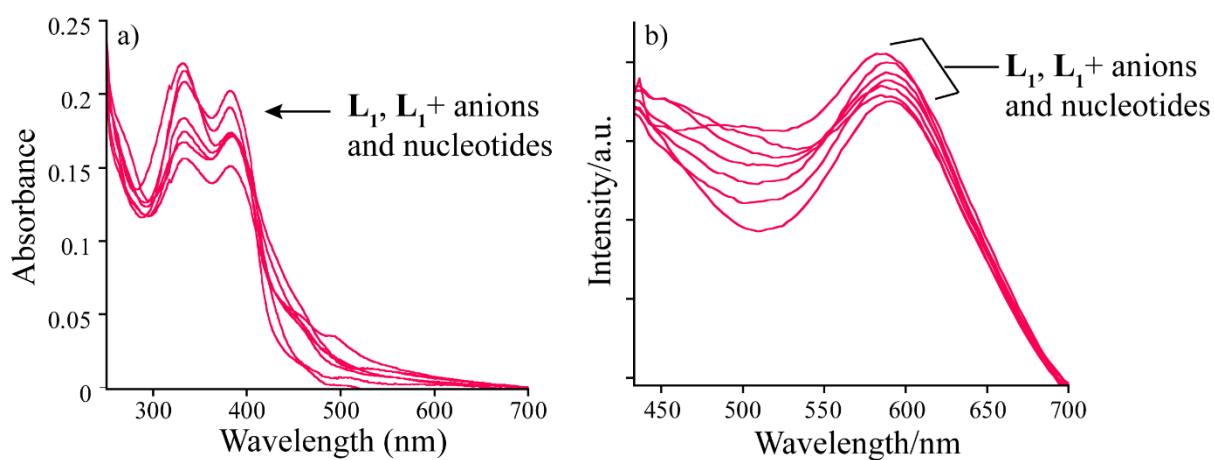

Figure S18. a) UV-Vis and b) fluorescence selectivity study of the naked probe  $L_1$  with anions and nucleotides in buffered ethanol (1:1 EtOH:10 mM HEPES buffer, pH~7.2).

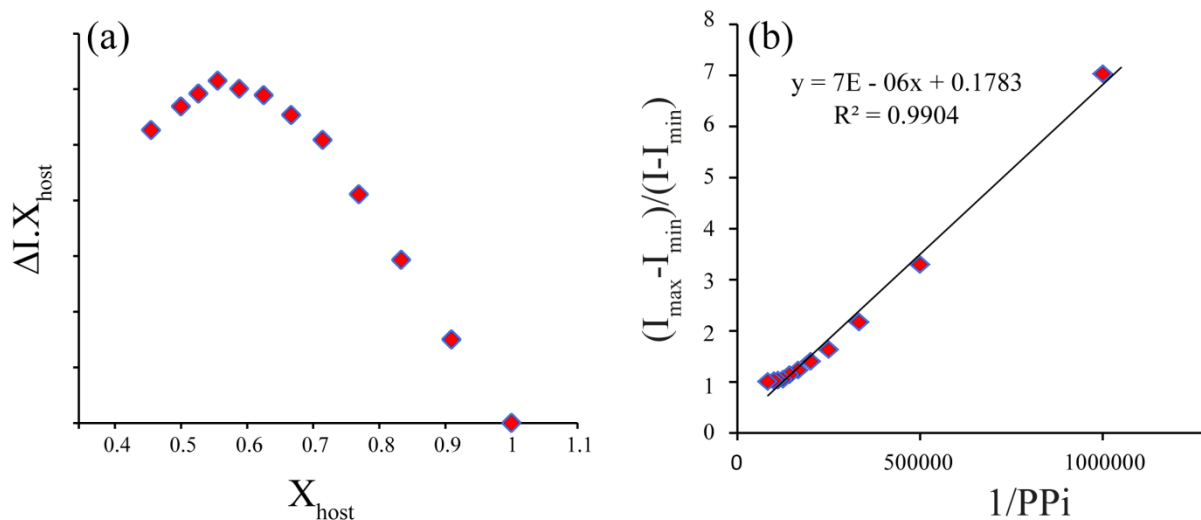

Figure S19. (a) Job's plot for determining the stoichiometry of 'L<sub>1</sub>-Zn<sup>2+</sup>' and PPI ion and (b) the corresponding Benesi–Hildebrand plot for binding constant determination.

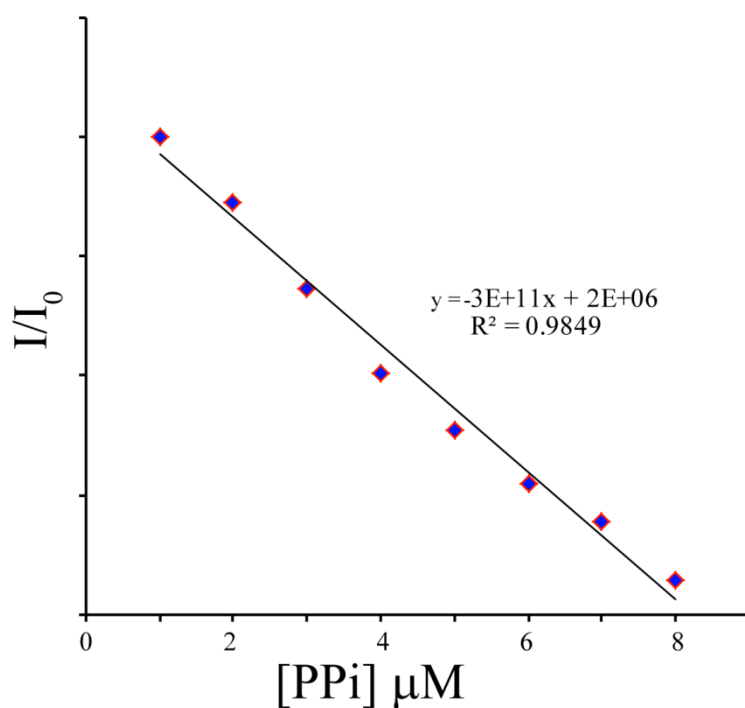

Figure S20. Ratio of fluorescence emission intensity change at 510 nm versus PPI concentrations for lowest detection limits (LOD) calculation.

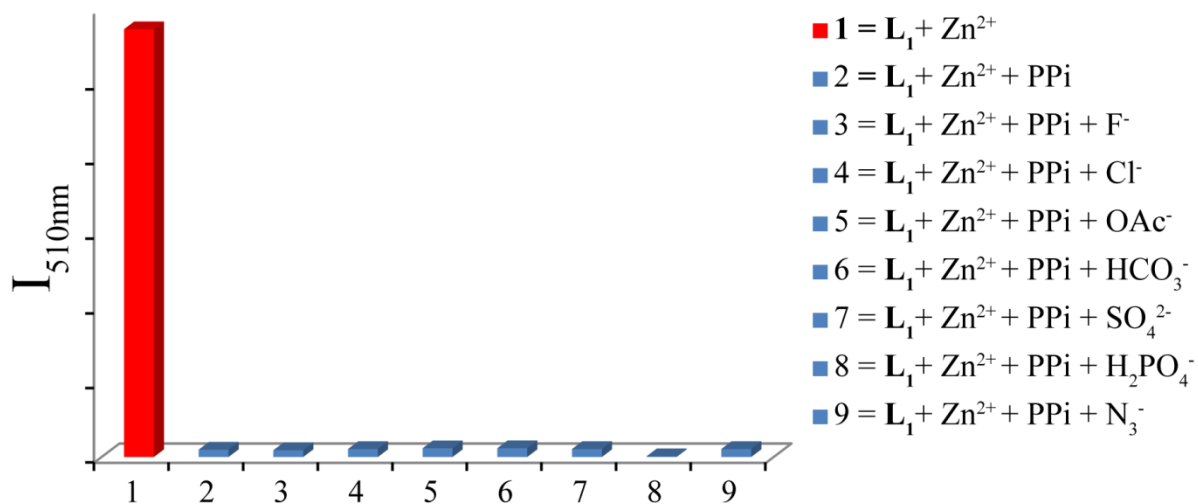

Figure S21. Competitive binding affinity of PPI towards the flourish ' $L_1-Zn^{2+}$ ' ensemble in presence of other anions (10 equivalents).

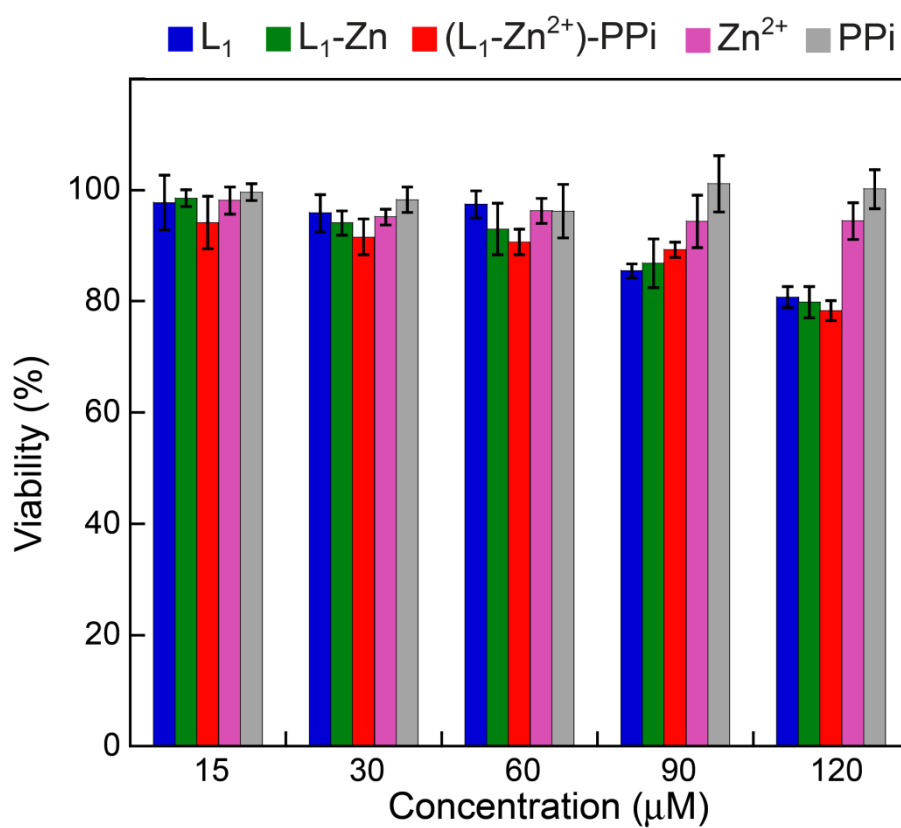

Figure S22. MTT based cytotoxicity assay for  $L_1$  and  $L_1$ -zinc complex.

Table S1. Comparison of metal sensing aptitude of some reported dipodal Schiff base type chemosensor.

| References                                                                                                                        | Experimental Medium                                                                            | Sensed Metal ion with LOD                                            | <i>In vivo</i> application                                 | Anion Sensing with LOD                                                          | <i>In vivo</i> application          |
|-----------------------------------------------------------------------------------------------------------------------------------|------------------------------------------------------------------------------------------------|----------------------------------------------------------------------|------------------------------------------------------------|---------------------------------------------------------------------------------|-------------------------------------|
| 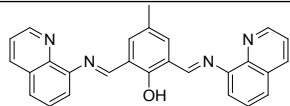<br>Anal. Chem., 2013, 85, 8369                  | Methanolic HEPES Buffer (3:2), pH 7.4                                                          | Zn <sup>2+</sup> sensor<br>LOD for Zn <sup>2+</sup><br><b>56 ppb</b> | Zn <sup>2+</sup> imaging                                   | PPi sensing,<br>LOD for PPi<br><b>2 ppb</b>                                     | PCR                                 |
| <br>Sensors and Actuators B 2013, 188, 1132–1140 | CH <sub>3</sub> CN/aqueous HEPES buffer (1:4, v/v)                                             | Zn <sup>2+</sup> sensor<br>LOD for Cu <sup>2+</sup><br><b>3 ppb</b>  | Cu <sup>2+</sup> imaging                                   | No anion sensing                                                                | -----                               |
| <br>Inorg. Chem., 2014, 53, 6655–6664            | CH <sub>3</sub> CN/ buffer (2:8, v/v)                                                          | Zn <sup>2+</sup> and Cu <sup>2+</sup> sensing<br>LOD not discussed   | Zn <sup>2+</sup> and Cu <sup>2+</sup> images in HELa cells | PPi sensing,<br>LOD for PPi<br><b>123 ppb</b>                                   | No imaging<br>Crystals of Zn and Cu |
| <br>RSC Adv., 2014, 4, 18270–18277              | CH <sub>3</sub> CH <sub>2</sub> OH–Tris–HCl buffer solution (50 mM Tris, 50 : 50, v/v, pH 7.2) | Zn <sup>2+</sup> sensor<br>LOD for Zn <sup>2+</sup><br><b>0.1 μM</b> | No imaging                                                 | S <sup>2-</sup> sensing,<br>LOD for S <sup>2-</sup><br><b>10<sup>-6</sup> M</b> | No imaging<br>Crystals of Zn and Cu |

Table S2. Comparison of some latest reported Zn<sup>2+</sup> chemosensors with the present work.

| Sl No. | References                                                                                                                            | Lowest Detection limit of Zn <sup>2+</sup> | Solvent system                                                                                 |
|--------|---------------------------------------------------------------------------------------------------------------------------------------|--------------------------------------------|------------------------------------------------------------------------------------------------|
| 1      | Present work                                                                                                                          | 25 ppb                                     | 7:3, v/v, MeOH, HEPES buffer, pH 7.2                                                           |
| 2      | Barun Kumar Datta, Sandipan Mukherjee, Chirantan Kar, Aiyagari Ramesh, and Gopal Das; <i>Org. Biomol. Chem.</i> , 2014,12, 4975-4982  | 56 ppm                                     | MeOH: aqueous HEPES buffer (1 mM, pH 7.4; 3:2 v/v)                                             |
| 3      | Sharanjeet Kaur, Vandana Bhalla and Manoj Kumar; <i>Chem. Commun.</i> , 2014,50, 9725-9728                                            | 110 nm                                     | (8:2, v/v H <sub>2</sub> O:THF)                                                                |
| 4      | Zhengping Dong, Xuanduong Le, Panpan Zhou, Chunxu Dong and Jiantai Ma; <i>RSC Adv.</i> , 2014, 4, 18270                               | 0.1 μM                                     | CH <sub>3</sub> CH <sub>2</sub> OH–Tris–HCl buffer solution (50 mM Tris, 50 : 50, v/v, pH 7.2) |
| 4      | Manoj Kumar, Naresh Kumar and Vandana Bhalla ; <i>Chem. Commun.</i> , 2013,49, 877-879                                                | 20×10 <sup>-8</sup> mol L <sup>-1</sup>    | H <sub>2</sub> O : CH <sub>3</sub> CN (2 : 8, v/v) HEPES buffer, pH=7.0                        |
| 5      | Jie Guan, Peng Zhang, Tai-bao Wei, Qi Lin, Hong Yao and You-ming Zhang; <i>RSC Adv.</i> , 2014, 4, 35797                              | 0.13 μM                                    | DMSO–H <sub>2</sub> O (8 : 2, v/v, containing 0.01 M HEPES, pH 7.24                            |
| 6      | Zhipeng Liu, Changli Zhang, Yuncong Chen, Fang Qian, Yang Bai, Weijiang He and Zijian Guo; <i>Chem. Commun.</i> , 2014, 50, 1253-1255 | 0.5 nM                                     | HEPES buffer (50 mM, 0.1 M KNO <sub>3</sub> , pH 7.2,                                          |
| 7      | Vijay Luxami, Kamaldeep Paula and In Howa Jeong; <i>Dalton Trans.</i> , 2013, 42, 3783                                                | -----                                      | CH <sub>3</sub> CN–H <sub>2</sub> O::1 : 1) (HEPES buffer, pH = 7.0)                           |
| 8      | Junfeng Wang, Bin Liu, Xiumin Liu, Matthew J. Panzner, Chrys Wesdemiotisa and Yi Pang; <i>Dalton Trans.</i> , 2014,43, 14142-14146    | -----                                      | EtOH                                                                                           |
